# Supplementary material for: A selective gut bacterial bile salt hydrolase alters host metabolism
Source: eLife journal article supplement (doi:10.7554/elife.37182), 2018-07-16
Supplement: supp [file elife-37182-supp-v1.zip]

Archive with 10 entries (10 files):
- elife_poa_e37182_Figure_2_figure_supplement_3.eps
- elife_poa_e37182_Figure_2_figure_supplement_1.eps
- elife_poa_e37182_Figure_4_figure_supplement_2.eps
- elife_poa_e37182_Figure_4_figure_supplement_1.eps
- elife_poa_e37182_Transparent_Reporting_File.pdf
- elife_poa_e37182_Figure_8_figure_supplement_2.eps
- elife_poa_e37182_Supplementary_file_1.xlsx
- elife_poa_e37182_Figure_6_figure_supplement_1.eps
- elife_poa_e37182_Figure_2_figure_supplement_2.eps
- elife_poa_e37182_Figure_8_figure_supplement_1.eps
