# Supplementary material for: A selective gut bacterial bile salt hydrolase alters host metabolism
Source: eLife journal article supplement (doi:10.7554/elife.37182), 2018-07-16
Supplement: supp [file elife-37182-supp-v1.zip › elife_poa_e37182_Supplementary_file_1.xlsx]

## Sheet: Table S1
Figure 4 - table supplement 1. Mouse experiment analyses
	Assays	Experiment
Bile acid profiling	Cecal contents	Monocolonization and CLAMS
	Feces	Monocolonization
	Distal ileum	CLAMS
	Liver	Monocolonization
	Plasma	Monocolonization
Body weight	Weight gain	Monocolonization
Monocolonization confirmation	Bacterial colonization efficiency via CFU; 16S rRNA gene PCR and 16S sequencing	Monocolonization and CLAMS
	16S and Bt BSH qRT-PCR	CLAMS
Lipid levels (plasma)	Plasma TAG	Monocolonization
	Plasma FFA	Monocolonization
	Plasma cholesterol	Monocolonization
Lipid levels (liver)	Total liver TAG	Monocolonization
	Total liver FFA	Monocolonization
	Total liver cholesterol	Monocolonization
	Total liver cholesterol esters	Monocolonization
Liver histology	Liver histology	Monocolonization
CLAMS	Respiratory exchange ratio, CO2 production, O2 consumption, locomotor activity	CLAMS
Detergent assay	Detergent assay	Data from CLAMS, bile acid profiling of distal ileum
Fecal Bomb Calorimetry	Fecal Bomb Calorimetry	CLAMS
Transcriptional data	RNA-Seq	Monocolonization
	qRT-PCR	Monocolonization
Glucose and hormones	Plasma glucose, insulin, leptin, and ghrelin	CLAMS
